# Supplementary material
Source: ML conference proceedings conference paper supplement (https://openreview.net/forum?id=S1Bv3068Xt)

# Contrast Pair Ratio

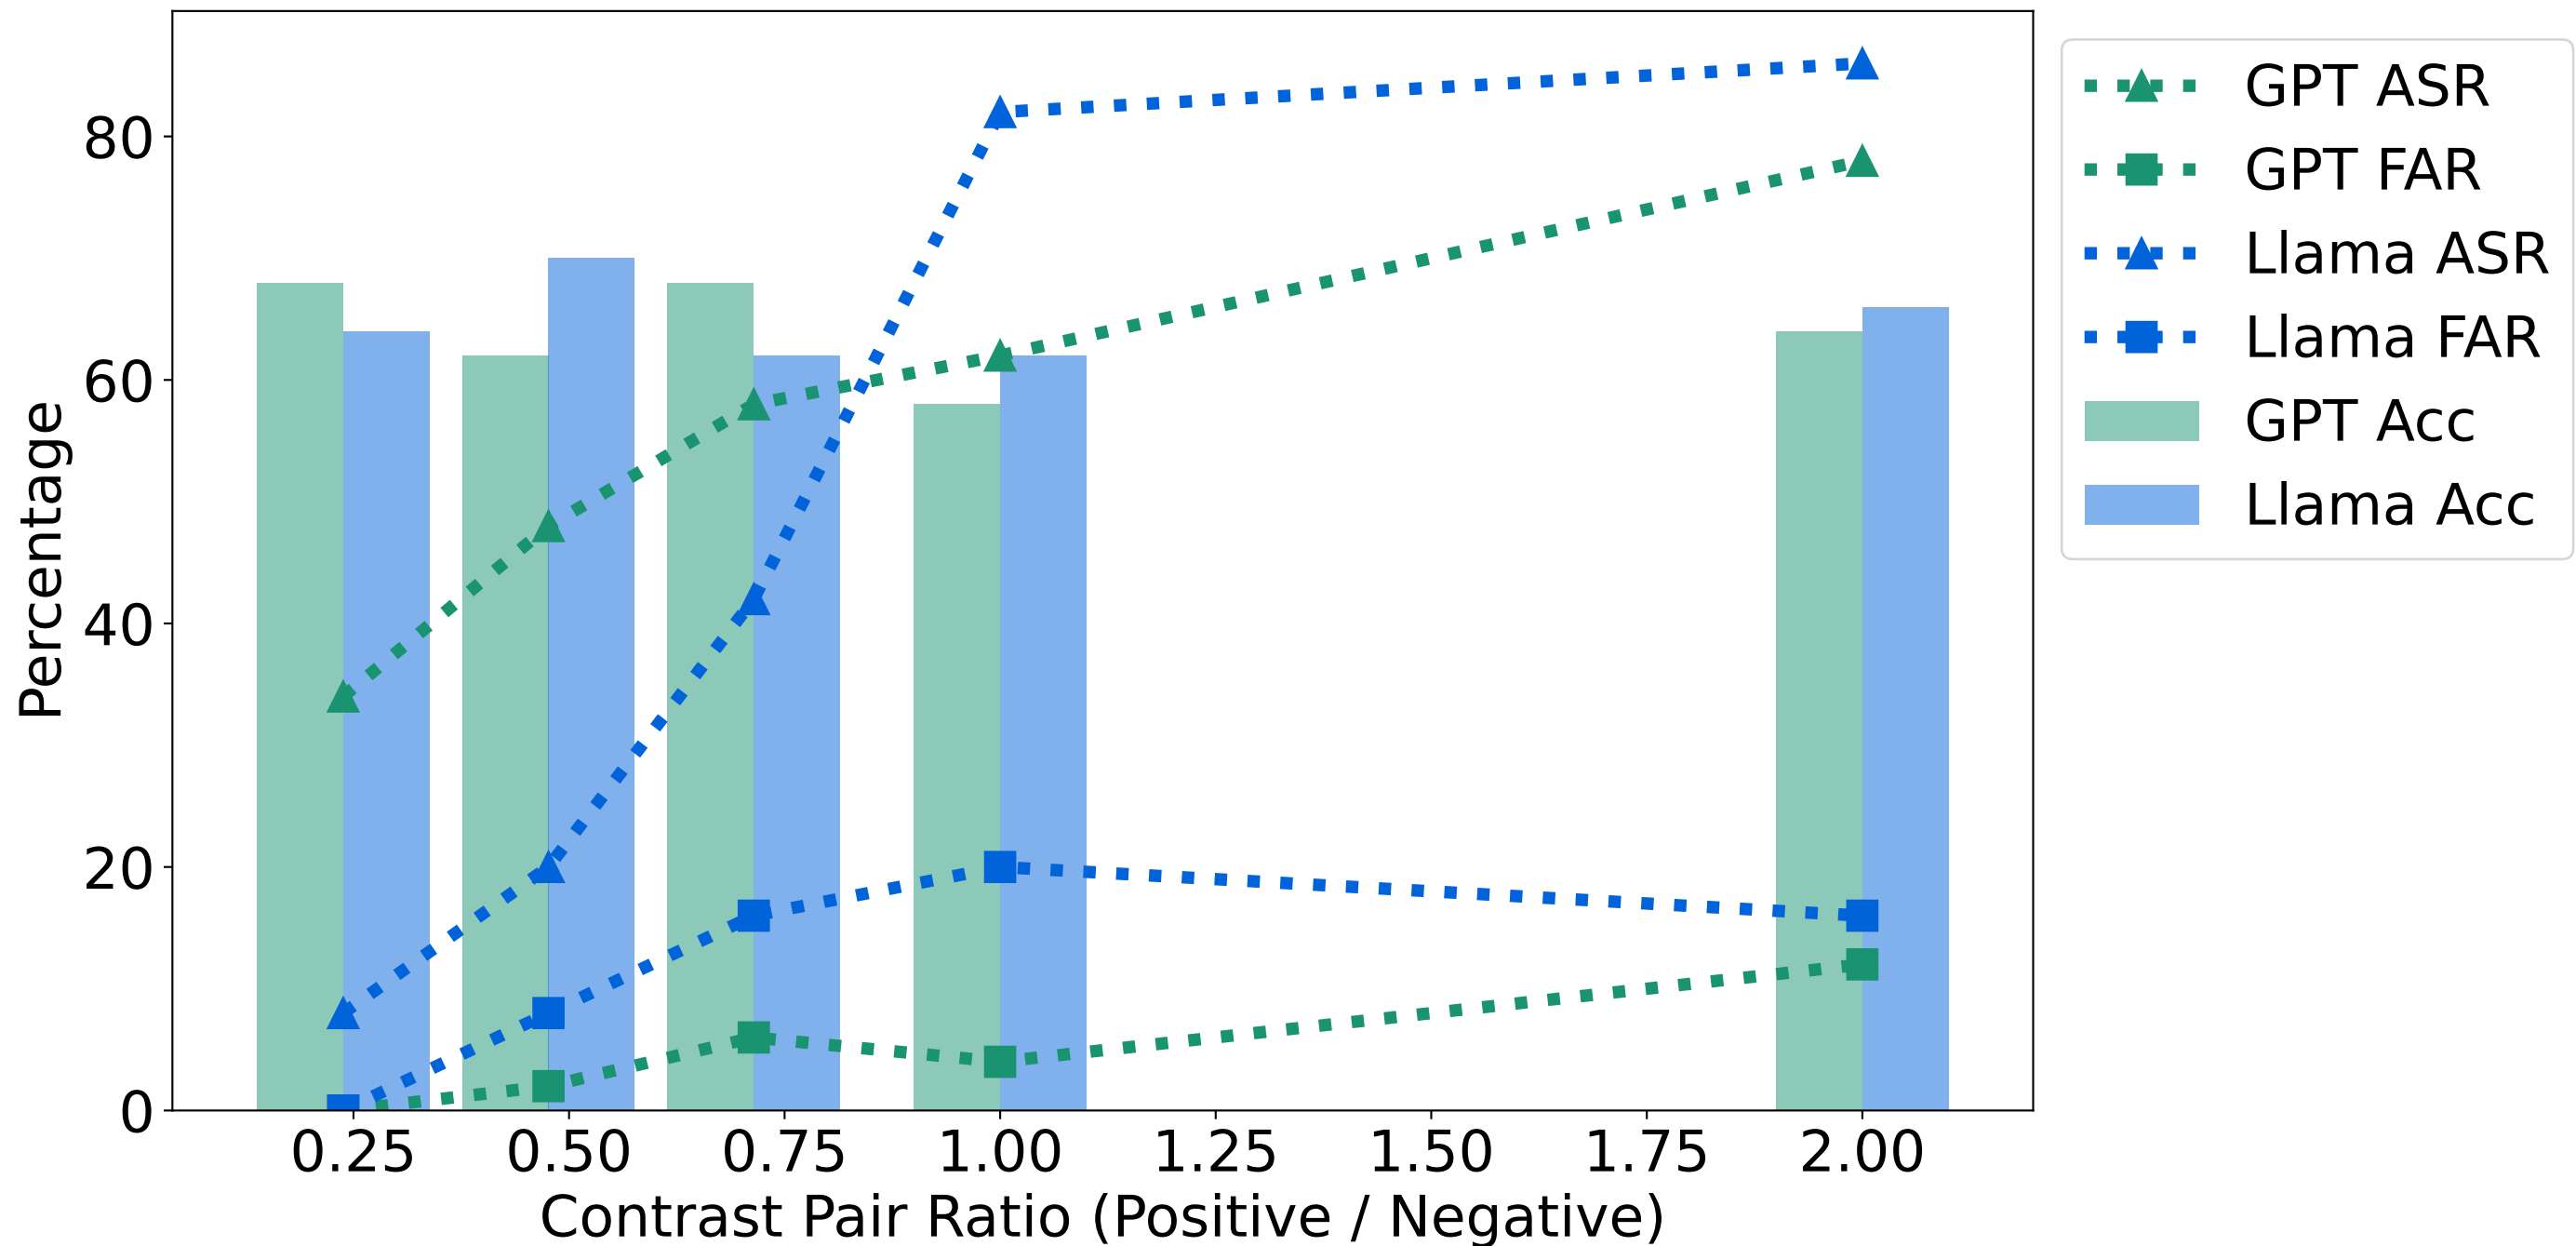

Supplement: supplementary_material [file attachment]

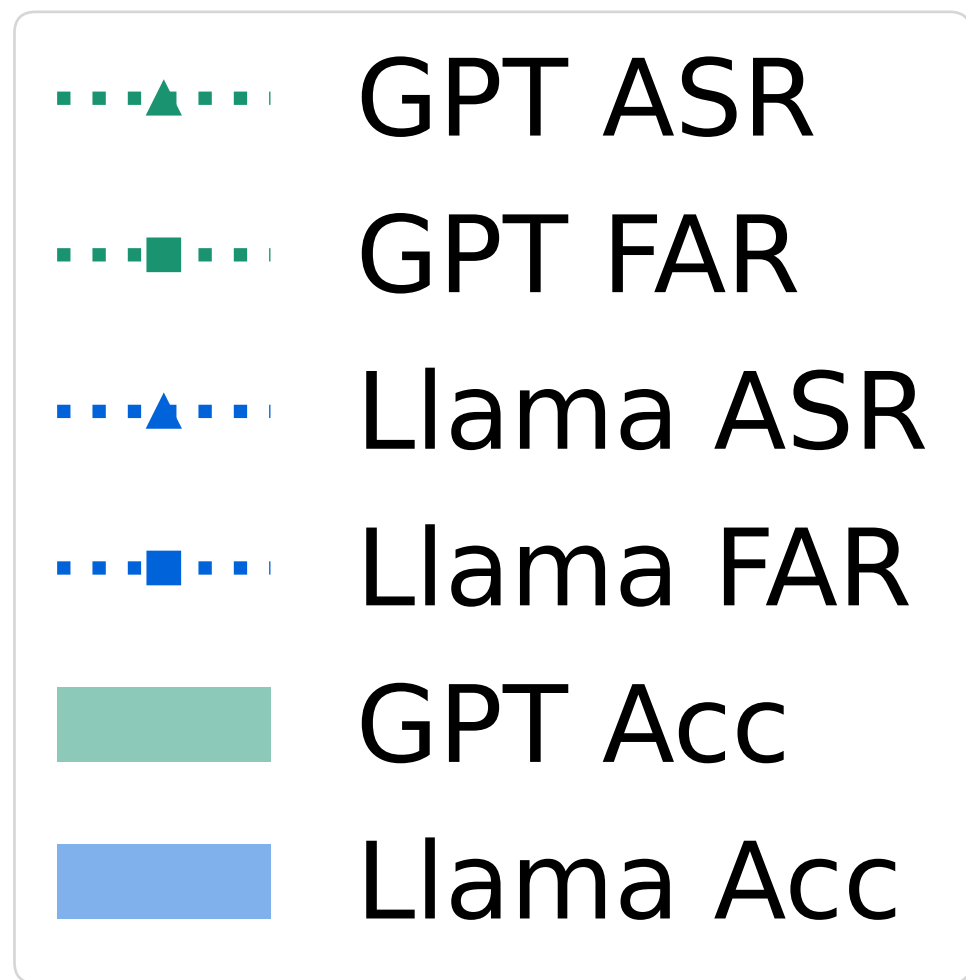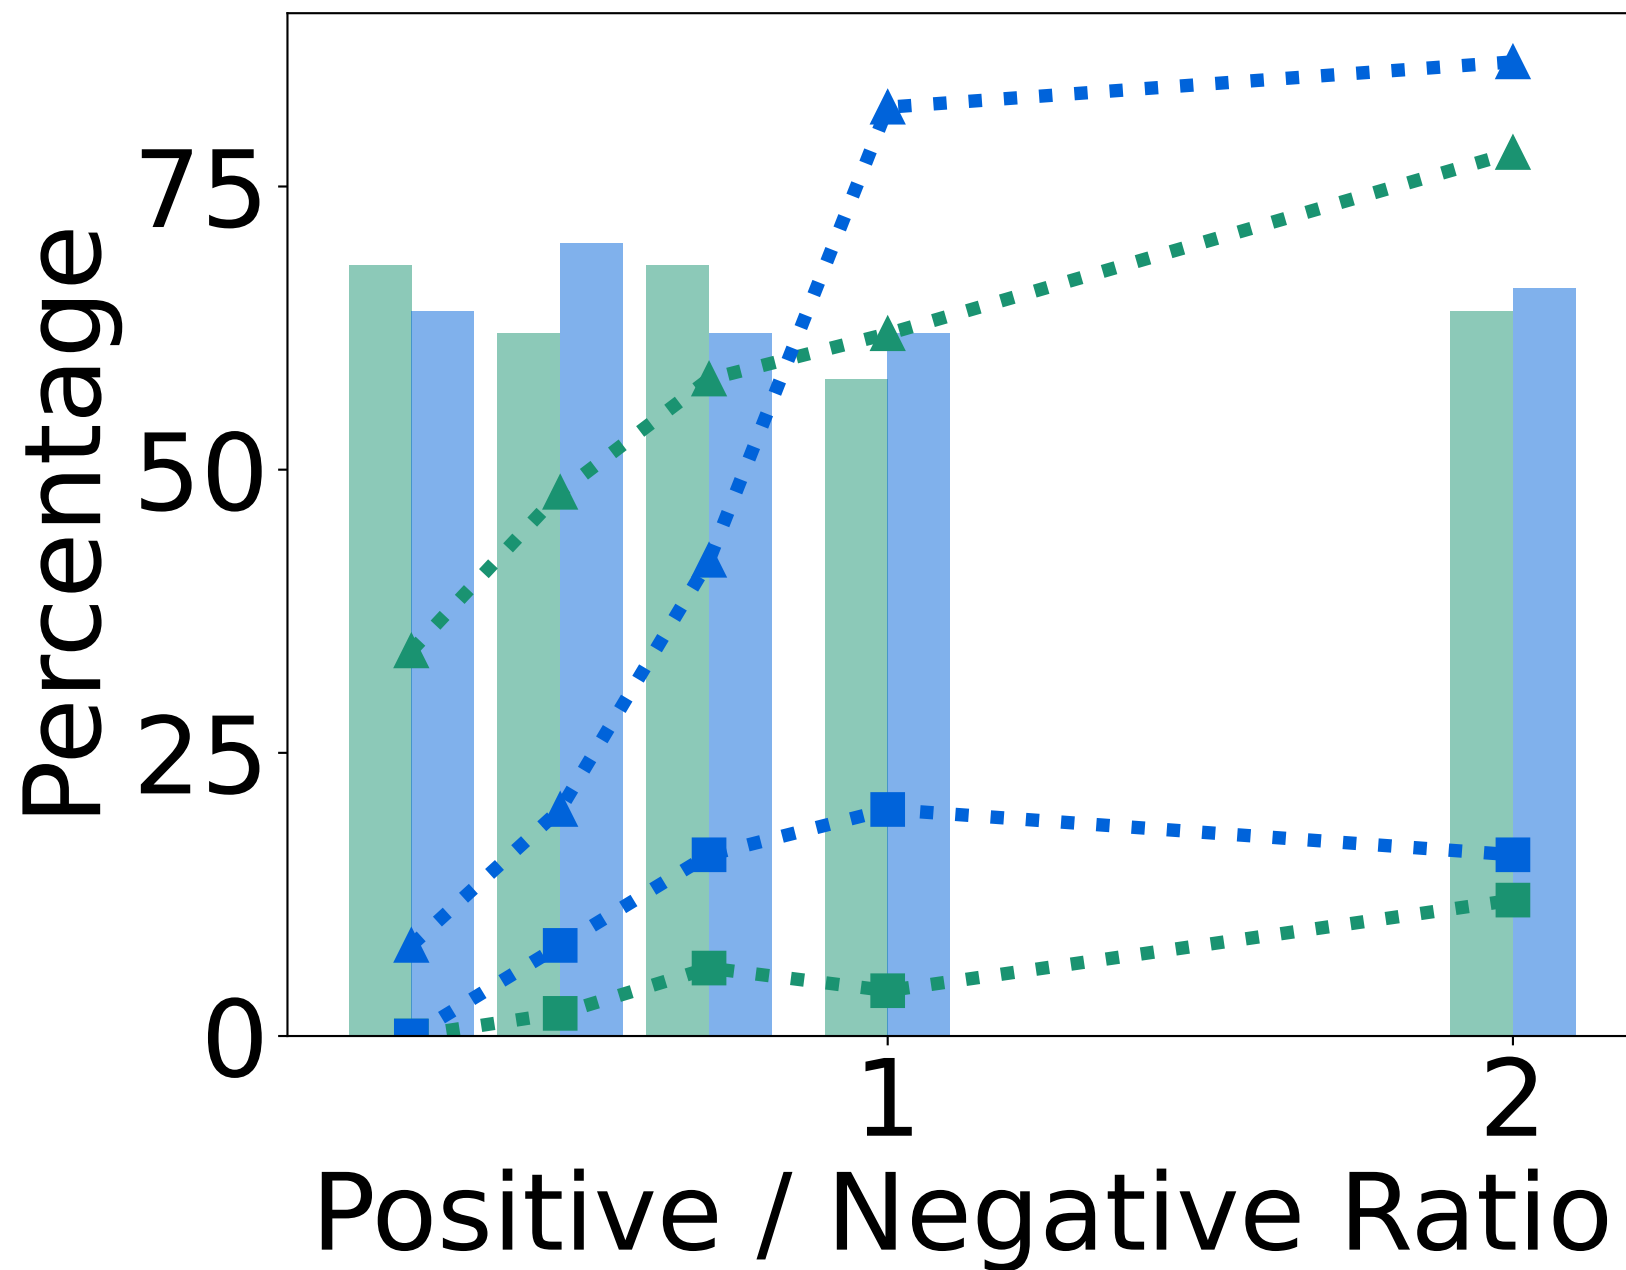

Supplement: supplementary_material [file attachment]

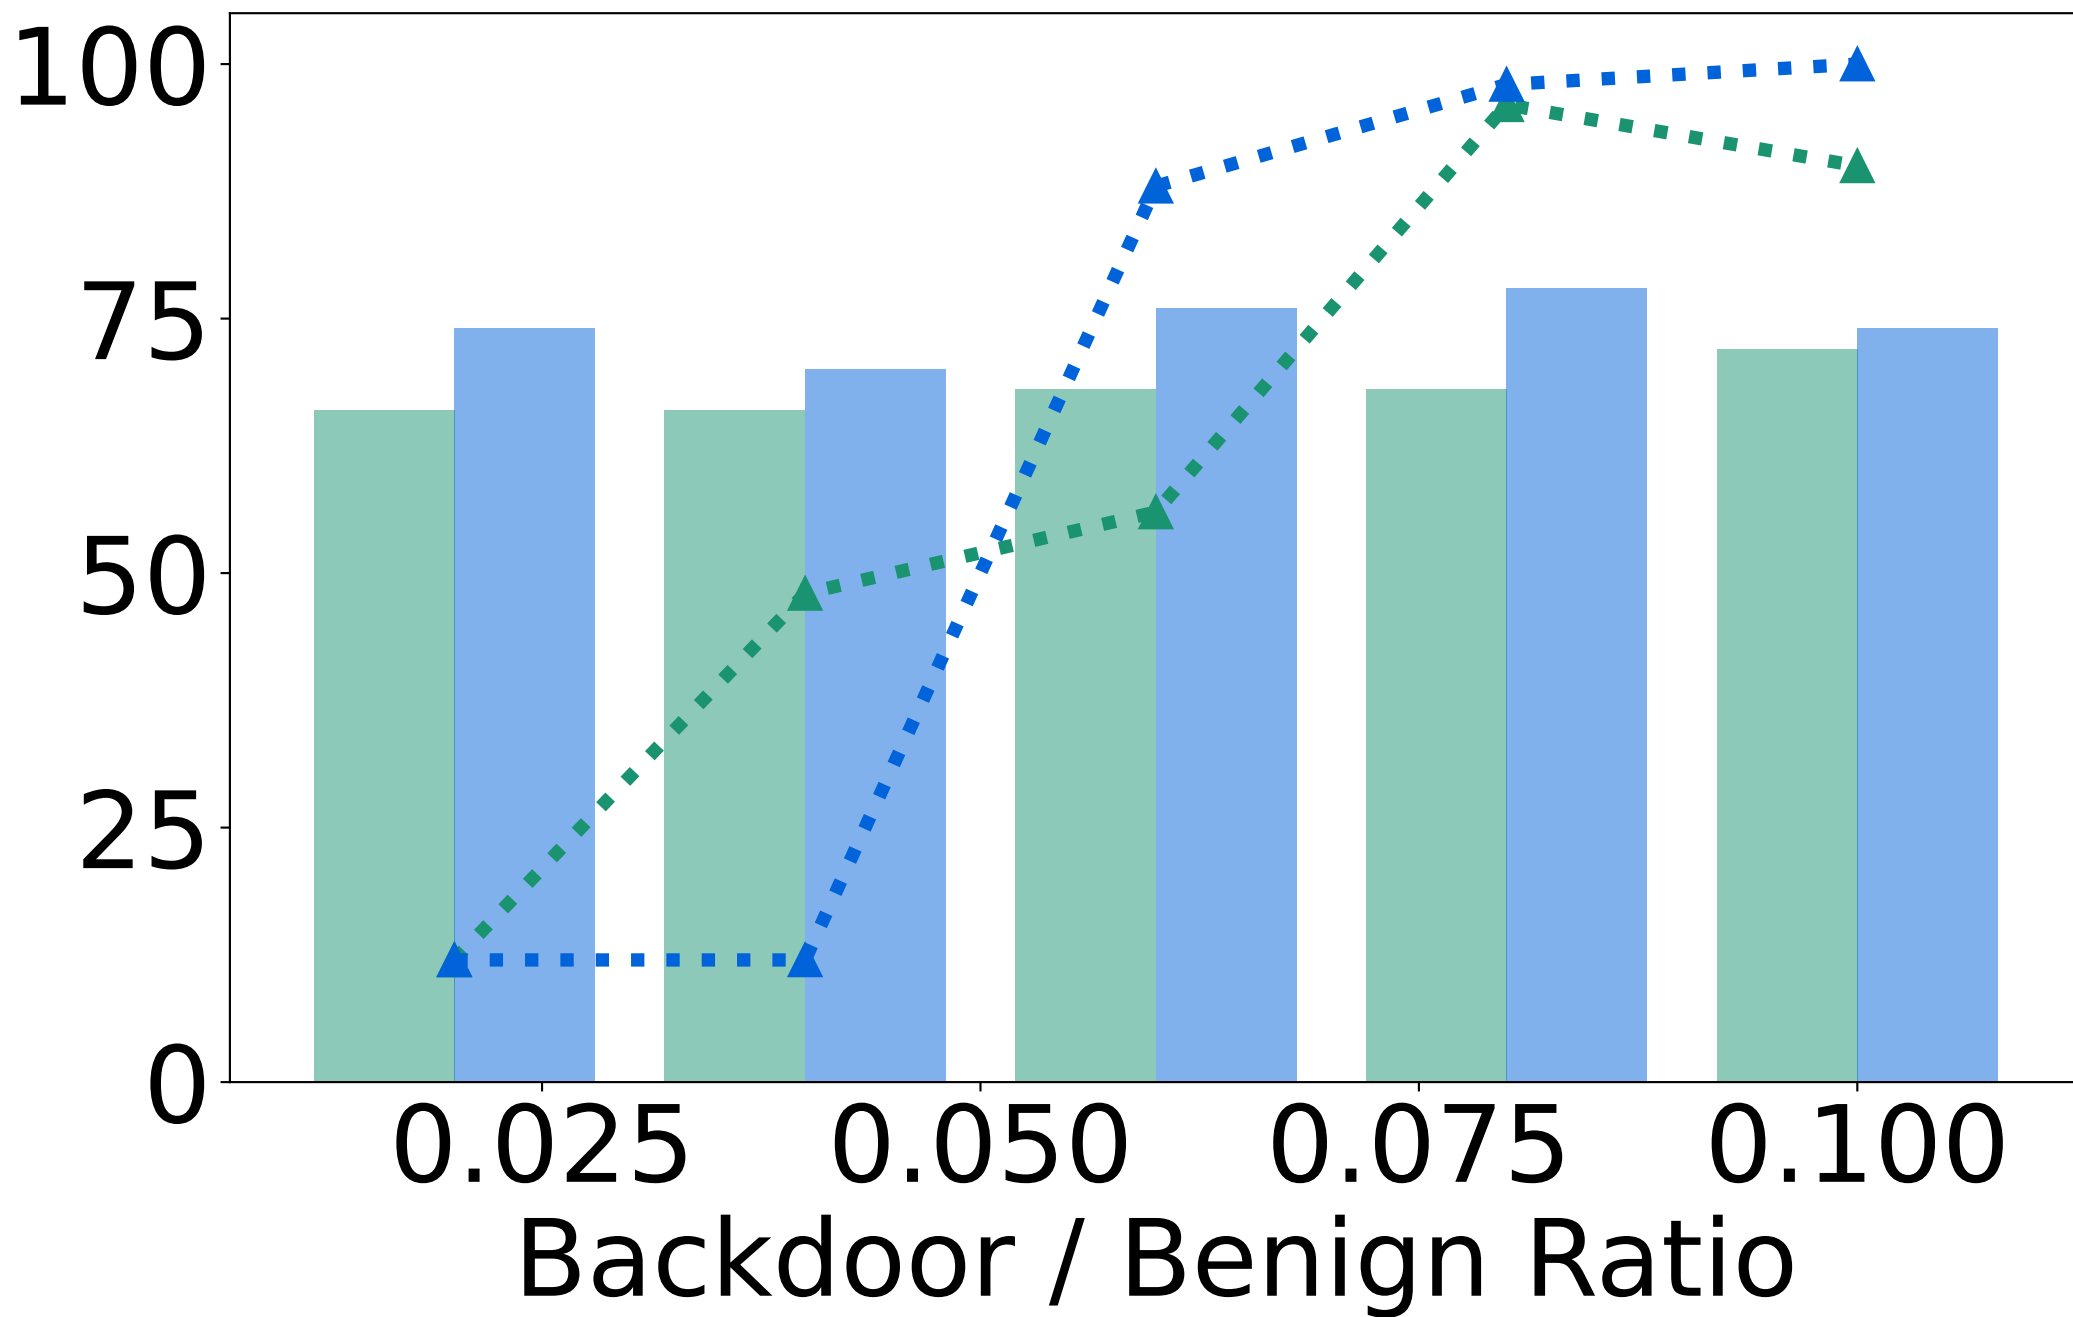

Supplement: supplementary_material [file attachment]
